# Supplementary material for: Synthesis and structure of color tunable and white-light emitting lanthanide metal–organic framework materials constructed from conjugated 1,1′-butadiynebenzene-3,3′,5,5′-tetracarboxylate ligand
Source: Royal Society of Chemistry journal article supplement (doi:10.1039/c6ra22001k), 2016-01-01
Supplement: c6ra22001k1.pdf [file c6ra22001k1.pdf]

***Supporting Information for***

**Syntheses, structures, color tunable and white–light emitting lanthanide metal–organic framework materials constructed from conjugated 1, 1'-butadiynebenzene-3, 3', 5, 5'-tetracarboxylate ligand**

Jiewei Rong,<sup>a,b</sup> Wenwei Zhang<sup>\*a</sup> and Junfeng Bai<sup>\*a</sup>

<sup>a</sup> *State Key Laboratory of Coordination Chemistry, School of Chemistry and Chemical Engineering, Nanjing University, Nanjing 210023, P. R. China. E-mail: [wwzhang@nju.edu.cn](mailto:wwzhang@nju.edu.cn), [bjunfeng@nju.edu.cn](mailto:bjunfeng@nju.edu.cn)*

<sup>b</sup> *School of Chemical and Materials Engineering, Huainan Normal University, Huainan, Anhui 232038, P. R. China. E-mail: [zwj0076@126.com](mailto:zwj0076@126.com)*

**Details for 2–7**

**[Eu<sub>2</sub>(BBTC)<sub>1.5</sub>(DMF)<sub>4</sub>]·2DMF·4H<sub>2</sub>O (2).** An identical procedure with **1** was followed to prepare **2** except SmCl<sub>3</sub>·6H<sub>2</sub>O was replaced by EuCl<sub>3</sub>·nH<sub>2</sub>O. Light–yellow block–shaped crystals were achieved (yield: 70% based on Eu). Anal. calcd for C<sub>48</sub>H<sub>59</sub>Eu<sub>2</sub>N<sub>6</sub>O<sub>22</sub>: C, 41.90; H, 4.32; N, 6.11. Found: C, 41.82; H, 4.06; N, 6.21. Selected IR data (KBr pellet, cm<sup>-1</sup>): 3424 (m), 3060 (w), 2930 (w), 1648 (s), 1560 (s), 1426 (s), 1378 (s), 1113 (s), 780 (m), 714 (m).

**[Gd<sub>2</sub>(BBTC)<sub>1.5</sub>(DMF)<sub>4</sub>]·2DMF·4H<sub>2</sub>O (3).** An identical procedure with **1** was followed to prepare **3** except SmCl<sub>3</sub>·6H<sub>2</sub>O was replaced by GdCl<sub>3</sub>·6H<sub>2</sub>O. Colorless block–shaped crystals were achieved (yield: 71% based on Gd). Anal. calcd for C<sub>48</sub>H<sub>59</sub>Gd<sub>2</sub>N<sub>6</sub>O<sub>22</sub>: C, 41.58; H, 4.29; N, 6.06. Found: C, 41.25; H, 4.19; N, 6.18. Selected IR data (KBr pellet, cm<sup>-1</sup>): 3414 (m), 3062 (w), 2940 (w), 1655 (s), 1550 (s),

1418 (s), 1370 (s), 1105 (s), 787 (m), 716 (m).

**[Tb<sub>2</sub>(BBTC)<sub>1.5</sub>(DMF)<sub>4</sub>]·2DMF·4H<sub>2</sub>O (4).** An identical procedure with **1** was followed to prepare **4** except SmCl<sub>3</sub>·6H<sub>2</sub>O was replaced by TbCl<sub>3</sub>·nH<sub>2</sub>O. Light–yellow block–shaped crystals were achieved (yield: 65% based on Tb). Anal. calcd for C<sub>48</sub>H<sub>59</sub>Tb<sub>2</sub>N<sub>6</sub>O<sub>22</sub>: C, 41.48; H, 4.28; N, 6.05. Found: C, 41.35; H, 4.15; N, 6.09. Selected IR data (KBr pellet, cm<sup>-1</sup>): 3374 (m), 3054 (w), 2920 (w), 1660 (s), 1550 (s), 1438 (s), 1378 (s), 1101 (s), 787 (m), 717 (m).

**[Dy<sub>2</sub>(BBTC)<sub>1.5</sub>(DMF)<sub>4</sub>]·2DMF·4H<sub>2</sub>O (5).** An identical procedure with **1** was followed to prepare **5** except SmCl<sub>3</sub>·6H<sub>2</sub>O was replaced by DyCl<sub>3</sub>·nH<sub>2</sub>O. Colorless block–shaped crystals were achieved (yield: 68% based on Dy). Anal. calcd for C<sub>48</sub>H<sub>59</sub>Dy<sub>2</sub>N<sub>6</sub>O<sub>22</sub>: C, 41.27; H, 4.26; N, 6.02. Found: C, 41.05; H, 4.18; N, 6.14. Selected IR data (KBr pellet, cm<sup>-1</sup>): 3344 (m), 3036 (w), 2935 (w), 1650 (s), 1540 (s), 1420 (s), 1371 (s), 1103 (s), 778 (m), 710 (m).

**[Er<sub>2</sub>(BBTC)<sub>1.5</sub>(DMF)<sub>4</sub>]·2DMF·4H<sub>2</sub>O (6).** An identical procedure with **1** was followed to prepare **6** except SmCl<sub>3</sub>·6H<sub>2</sub>O was replaced by ErCl<sub>3</sub>·nH<sub>2</sub>O. Light–pink block–shaped crystals were achieved (yield: 73% based on Er). Anal. calcd for C<sub>48</sub>H<sub>59</sub>Er<sub>2</sub>N<sub>6</sub>O<sub>22</sub>: C, 40.99; H, 4.23; N, 5.98. Found: C, 40.64; H, 4.25; N, 6.05. Selected IR data (KBr pellet, cm<sup>-1</sup>): 3390 (m), 3064 (w), 2934 (w), 1670 (s), 1560 (s), 1430 (s), 1368 (s), 1093 (s), 789 (m), 737 (m).

**[Yb<sub>2</sub>(BBTC)<sub>1.5</sub>(DMF)<sub>4</sub>]·2DMF·4H<sub>2</sub>O (7).** An identical procedure with **1** was followed to prepare **7** except SmCl<sub>3</sub>·6H<sub>2</sub>O was replaced by YbCl<sub>3</sub>·nH<sub>2</sub>O. Colorless block–shaped crystals were achieved (yield: 74% based on Yb). Anal. calcd for C<sub>48</sub>H<sub>59</sub>Yb<sub>2</sub>N<sub>6</sub>O<sub>22</sub>: C, 40.65; H, 4.19; N, 5.93. Found: C, 40.19; H, 4.14; N, 6.03. Selected IR data (KBr pellet, cm<sup>-1</sup>): 3385 (m), 3042 (w), 2956 (w), 1660 (s), 1510 (s), 1460 (s), 1378 (s), 1109 (s), 789 (m), 707 (m).

**Table S1** Elemental analysis and main IR bands for **1–7**

| Formula                                                                                 | C%<br>(Found) <sup>a</sup> | H%<br>(Found)  | N%<br>(Found)  | Main IR Bands                                                                   |
|-----------------------------------------------------------------------------------------|----------------------------|----------------|----------------|---------------------------------------------------------------------------------|
| <b>1</b> C <sub>48</sub> H <sub>59</sub> Sm <sub>2</sub> N <sub>6</sub> O <sub>22</sub> | 42.00<br>(41.98)           | 4.33<br>(4.26) | 6.12<br>(6.24) | 3390 m, 3065 w, 2933 w, 1650 s, 1550 s,<br>1430 s, 1378 s, 1103 s, 787 m, 717 m |
| <b>2</b> C <sub>48</sub> H <sub>59</sub> Eu <sub>2</sub> N <sub>6</sub> O <sub>22</sub> | 41.90<br>(41.82)           | 4.32<br>(4.06) | 6.11<br>(6.21) | 3424 m, 3060 w, 2930 w, 1648 s, 1560 s,<br>1426 s, 1378 s, 1113 s, 780 m, 714 m |
| <b>3</b> C <sub>48</sub> H <sub>59</sub> Gd <sub>2</sub> N <sub>6</sub> O <sub>22</sub> | 41.58<br>(41.25)           | 4.29<br>(4.19) | 6.06<br>(6.18) | 3414 m, 3062 w, 2940 w, 1655 s, 1550 s,<br>1418 s, 1370 s, 1105 s, 787 m, 716 m |
| <b>4</b> C <sub>48</sub> H <sub>59</sub> Tb <sub>2</sub> N <sub>6</sub> O <sub>22</sub> | 41.48<br>(41.35)           | 4.28<br>(4.15) | 6.05<br>(6.09) | 3374 m, 3054 w, 2920 w, 1660 s, 1550 s,<br>1438 s, 1378 s, 1101 s, 787 m, 717 m |
| <b>5</b> C <sub>48</sub> H <sub>59</sub> Dy <sub>2</sub> N <sub>6</sub> O <sub>22</sub> | 41.27<br>(41.05)           | 4.26<br>(4.18) | 6.02<br>(6.14) | 3344 m, 3036 w, 2935 w, 1650 s, 1540 s,<br>1420 s, 1371 s, 1103 s, 778 m, 710 m |
| <b>6</b> C <sub>48</sub> H <sub>59</sub> Er <sub>2</sub> N <sub>6</sub> O <sub>22</sub> | 40.99<br>(40.64)           | 4.23<br>(4.25) | 5.98<br>(6.05) | 3390 m, 3064 w, 2934 w, 1670 s, 1560 s,<br>1430 s, 1368 s, 1093 s, 789 m, 737 m |
| <b>7</b> C <sub>48</sub> H <sub>59</sub> Yb <sub>2</sub> N <sub>6</sub> O <sub>22</sub> | 40.65<br>(40.19)           | 4.19<br>(4.14) | 5.93<br>(6.03) | 3385 m, 3042 w, 2956 w, 1660 s, 1510 s,<br>1460 s, 1378 s, 1109 s, 789 m, 707 m |

<sup>a</sup>Calculated value from formula, followed by experimental value in parentheses.

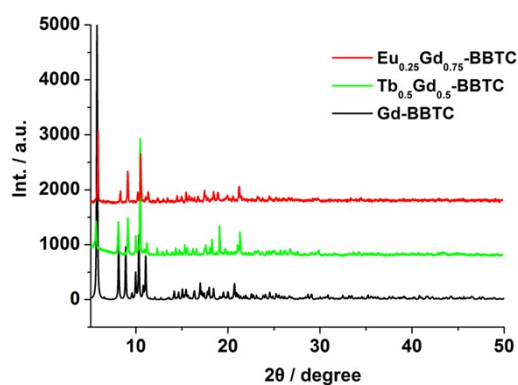

**Fig. S1** Powder X-ray diffraction patterns of **Gd-BBTC**, **Eu<sub>0.25</sub>Gd<sub>0.75</sub>-BBTC** and **Tb<sub>0.5</sub>Gd<sub>0.5</sub>-BBTC** at ambient temperature.

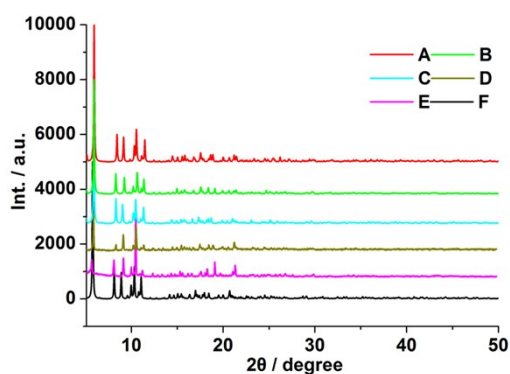

**Fig. S2** The PXRD patterns for complex **Gd-BBTC (F)** and the co-doped complexes **Eu<sub>x</sub>Tb<sub>y</sub>Gd<sub>1-x-y</sub>-BBTC (A-E)** (Eu, Tb, Gd%): **A** (4.5, 5.5, 90), **B** (4, 5, 91), **C** (3, 4.5, 92.5), **D** (2.5, 4, 93.5) and **E** (1.5, 3.5, 95).

**Table S2** Elemental analysis for **Eu<sub>x</sub>Gd<sub>1-x</sub>-BBTC** and **Tb<sub>y</sub>Gd<sub>1-y</sub>-BBTC** co-doped compounds

| Ln-BBTC                                        | Wt% C         | Wt% H         | Wt% N         |
|------------------------------------------------|---------------|---------------|---------------|
|                                                | Calcd (Found) | Calcd (Found) | Calcd (Found) |
| <b>Eu<sub>0.40</sub>Gd<sub>0.60</sub>-BBTC</b> | 41.72 (41.59) | 4.30 (4.09)   | 6.08 (6.09)   |
| <b>Eu<sub>0.25</sub>Gd<sub>0.75</sub>-BBTC</b> | 41.66 (41.37) | 4.30 (4.25)   | 6.07 (6.19)   |
| <b>Tb<sub>0.75</sub>Gd<sub>0.25</sub>-BBTC</b> | 41.50 (41.24) | 4.28 (4.05)   | 6.05 (6.12)   |
| <b>Tb<sub>0.50</sub>Gd<sub>0.50</sub>-BBTC</b> | 41.53 (41.35) | 4.28 (4.03)   | 6.05 (6.18)   |
| <b>Tb<sub>0.25</sub>Gd<sub>0.75</sub>-BBTC</b> | 41.56 (41.43) | 4.29 (4.15)   | 6.06 (6.14)   |

**Table S3** Elemental analysis for **Eu<sub>x</sub>Tb<sub>y</sub>Gd<sub>1-x-y</sub>-BBTC** co-doped compounds

| Ln-BBTC                                                           | Wt% C         | Wt% H         | Wt% N         |
|-------------------------------------------------------------------|---------------|---------------|---------------|
|                                                                   | Calcd (Found) | Calcd (Found) | Calcd (Found) |
| <b>Eu<sub>0.045</sub>Tb<sub>0.055</sub>Gd<sub>0.9</sub>-BBTC</b>  | 41.59 (41.26) | 4.29 (4.18)   | 6.06 (6.12)   |
| <b>Eu<sub>0.04</sub>Tb<sub>0.05</sub>Gd<sub>0.91</sub>-BBTC</b>   | 41.58 (41.34) | 4.29 (4.15)   | 6.06 (6.15)   |
| <b>Eu<sub>0.03</sub>Tb<sub>0.045</sub>Gd<sub>0.925</sub>-BBTC</b> | 41.58 (41.41) | 4.29 (4.21)   | 6.06 (5.95)   |
| <b>Eu<sub>0.025</sub>Tb<sub>0.04</sub>Gd<sub>0.935</sub>-BBTC</b> | 41.58 (41.39) | 4.29 (4.13)   | 6.06 (6.09)   |
| <b>Eu<sub>0.015</sub>Tb<sub>0.035</sub>Gd<sub>0.95</sub>-BBTC</b> | 41.58 (41.29) | 4.29 (4.18)   | 6.06 (6.01)   |

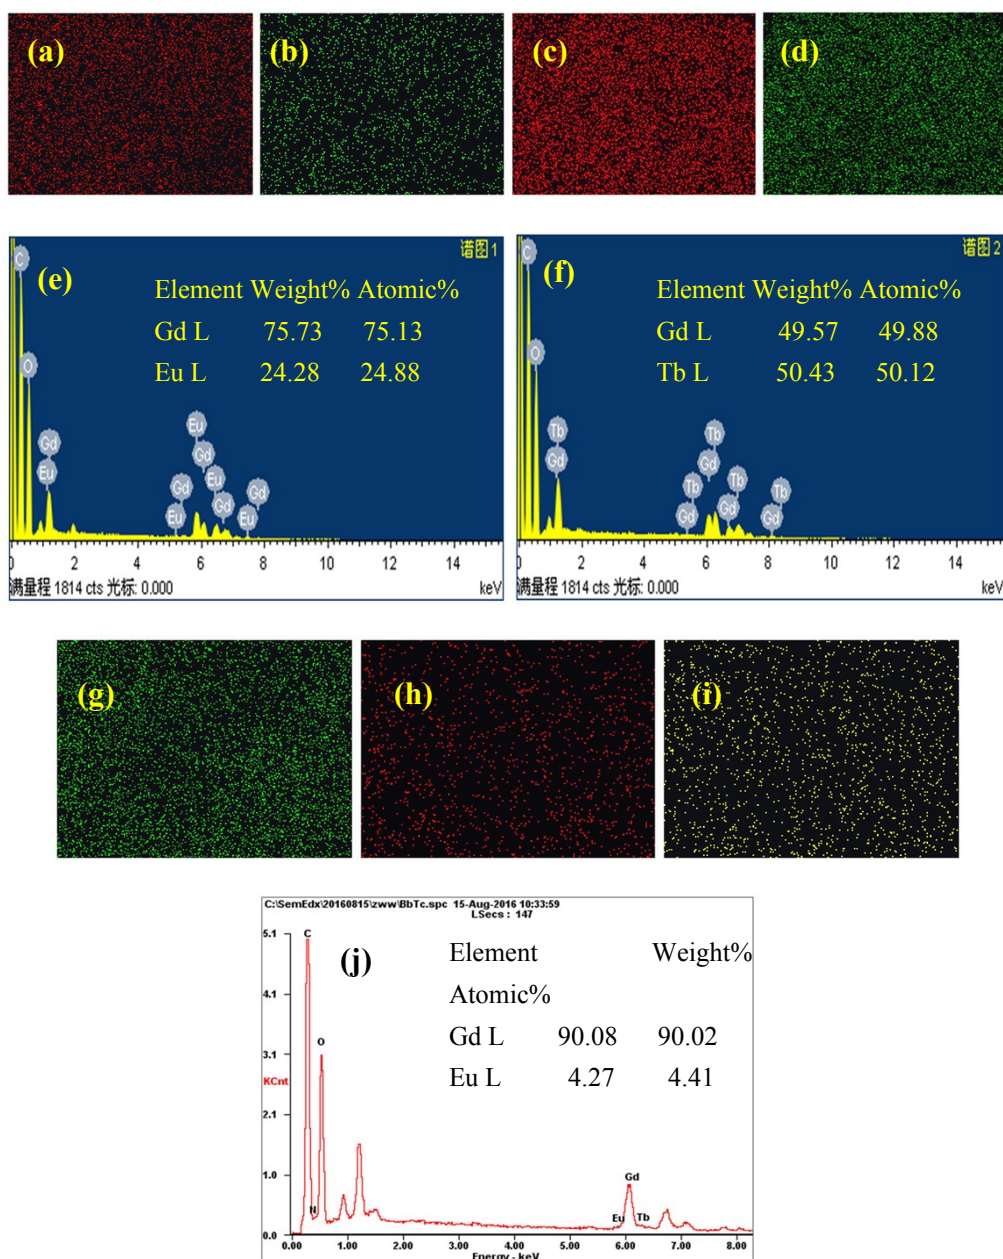

**Fig. S3** Elemental mapping images of (a, b)  $\text{Eu}_{0.25}\text{Gd}_{0.75}\text{-BBTC}$  (red and green dots represent the Gd and the Eu elements, respectively), (c, d)  $\text{Tb}_{0.50}\text{Gd}_{0.50}\text{-BBTC}$  (red and green dots represent the Gd and the Tb elements, respectively) and (g, h, i)  $\text{Eu}_{0.045}\text{Tb}_{0.055}\text{Gd}_{0.9}\text{-BBTC}$  (green, red and yellow dots represent the Gd, Eu and Tb elements, respectively), and EDX-spectra of (e)  $\text{Eu}_{0.25}\text{Gd}_{0.75}\text{-BBTC}$ , (f)  $\text{Tb}_{0.50}\text{Gd}_{0.50}\text{-BBTC}$  and (j)  $\text{Eu}_{0.045}\text{Tb}_{0.055}\text{Gd}_{0.9}\text{-BBTC}$ .

**Table S4** ICP analysis for **Eu<sub>x</sub>Gd<sub>1-x</sub>-BBTC**, **Tb<sub>y</sub>Gd<sub>1-y</sub>-BBTC** and **Eu<sub>x</sub>Tb<sub>y</sub>Gd<sub>1-x-y</sub>-BBTC** co-doped compounds

| Ln-BBTC                                                          | Wt% Gd        | Wt% Eu        | Wt% Tb        |
|------------------------------------------------------------------|---------------|---------------|---------------|
|                                                                  | Calcd (Found) | Calcd (Found) | Calcd (Found) |
| <b>Eu<sub>0.25</sub>Gd<sub>0.75</sub>-BBTC</b>                   | 75.64 (75.42) | 24.36 (24.58) | –             |
| <b>Tb<sub>0.5</sub>Gd<sub>0.5</sub>-BBTC</b>                     | 49.74 (49.50) | –             | 50.26 (50.50) |
| <b>Eu<sub>0.045</sub>Tb<sub>0.055</sub>Gd<sub>0.9</sub>-BBTC</b> | 90.09 (89.85) | 4.35 (4.52)   | 5.56 (5.63)   |

**Table S5** Crystallographic data and structural refinements for **1** and **3**

| Compound                                                                                 | <b>1</b>                                                                       | <b>3</b>                                                                       |
|------------------------------------------------------------------------------------------|--------------------------------------------------------------------------------|--------------------------------------------------------------------------------|
| Formula                                                                                  | C <sub>48</sub> H <sub>59</sub> Sm <sub>2</sub> N <sub>6</sub> O <sub>22</sub> | C <sub>48</sub> H <sub>59</sub> Gd <sub>2</sub> N <sub>6</sub> O <sub>22</sub> |
| Formula weight                                                                           | 1373                                                                           | 1387                                                                           |
| Temperature (K)                                                                          | 296(2)                                                                         | 296(2)                                                                         |
| Crystal system                                                                           | monoclinic                                                                     | monoclinic                                                                     |
| Space group                                                                              | <i>C2/c</i>                                                                    | <i>C2/c</i>                                                                    |
| <i>a</i> (Å)                                                                             | 29.919(5)                                                                      | 30.62(4)                                                                       |
| <i>b</i> (Å)                                                                             | 21.281(3)                                                                      | 21.76(3)                                                                       |
| <i>c</i> (Å)                                                                             | 19.185(3)                                                                      | 19.90(3)                                                                       |
| <i>α</i> (deg)                                                                           | 90.00                                                                          | 90.00                                                                          |
| <i>β</i> (deg)                                                                           | 93.690(4)                                                                      | 93.52(2)                                                                       |
| <i>γ</i> (deg)                                                                           | 90.00                                                                          | 90.00                                                                          |
| <i>V</i> (Å <sup>3</sup> )                                                               | 12190(3)                                                                       | 13231(31)                                                                      |
| <i>Z</i>                                                                                 | 8                                                                              | 8                                                                              |
| <i>F</i> (000)                                                                           | 4552                                                                           | 4584                                                                           |
| GOF                                                                                      | 1.079                                                                          | 1.021                                                                          |
| <i>R</i> <sub>1</sub> , <i>wR</i> <sub>2</sub> [ <i>I</i> > 2σ( <i>I</i> )] <sup>a</sup> | 0.1225, 0.2493                                                                 | 0.0885, 0.2018                                                                 |

<sup>a</sup>*R*<sub>1</sub> = Σ||*F*<sub>o</sub>| - |*F*<sub>c</sub>||/Σ|*F*<sub>o</sub>|; *wR*<sub>2</sub> = {Σ [w(*F*<sub>o</sub><sup>2</sup> - *F*<sub>c</sub><sup>2</sup>)]/Σ(w(*F*<sub>o</sub><sup>2</sup>))}<sup>1/2</sup>

**Table S6** Selected bond distances (Å) in **1–7**

| 1       |           |         |           |         |           |
|---------|-----------|---------|-----------|---------|-----------|
| Sm1–O11 | 2.332(5)  | Sm1–O13 | 2.372(7)  | Sm1–O6  | 2.373(5)  |
| Sm1–O5  | 2.402(5)  | Sm1–O12 | 2.417(5)  | Sm1–O15 | 2.438(6)  |
| Sm1–O2  | 2.455(5)  | Sm1–O1  | 2.477(5)  | Sm2–O16 | 2.287(7)  |
| Sm2–O3  | 2.319(5)  | Sm2–O4  | 2.337(5)  | Sm2–O9  | 2.388(6)  |
| Sm2–O14 | 2.426(7)  | Sm2–O8  | 2.429(5)  | Sm2–O10 | 2.507(6)  |
| Sm2–O7  | 2.508(5)  |         |           |         |           |
| 2       |           |         |           |         |           |
| Eu1–O11 | 2.332(3)  | Eu1–O6  | 2.364(3)  | Eu1–O5  | 2.390(3)  |
| Eu1–O12 | 2.406(3)  | Eu1–O13 | 2.419(5)  | Eu1–O14 | 2.419(5)  |
| Eu1–O2  | 2.444(3)  | Eu1–O1  | 2.496(3)  | Eu2–O4  | 2.297(3)  |
| Eu2–O3  | 2.303(4)  | Eu2–O15 | 2.343(6)  | Eu2–O16 | 2.377(8)  |
| Eu2–O10 | 2.415(4)  | Eu2–O8  | 2.418(3)  | Eu2–O9  | 2.488(4)  |
| Eu2–O7  | 2.489(3)  |         |           |         |           |
| 3       |           |         |           |         |           |
| Gd1–O8  | 2.368(10) | Gd1–O11 | 2.374(9)  | Gd1–O15 | 2.401(16) |
| Gd1–O7  | 2.419(12) | Gd1–O16 | 2.448(14) | Gd1–O12 | 2.465(9)  |
| Gd1–O2  | 2.492(10) | Gd1–O1  | 2.536(10) | Gd2–O13 | 2.186(17) |
| Gd2–O3  | 2.331(11) | Gd2–O4  | 2.350(10) | Gd2–O14 | 2.402(16) |
| Gd2–O6  | 2.453(12) | Gd2–O9  | 2.463(11) | Gd2–O10 | 2.537(11) |
| Gd2–O5  | 2.544(8)  |         |           |         |           |
| 4       |           |         |           |         |           |
| Tb1–O11 | 2.299(4)  | Tb1–O8  | 2.327(4)  | Tb1–O7  | 2.362(5)  |
| Tb1–O12 | 2.370(4)  | Tb1–O17 | 2.399(7)  | Tb1–O19 | 2.400(14) |
| Tb1–O1  | 2.421(4)  | Tb1–O2  | 2.464(4)  | Tb2–O4  | 2.277(5)  |
| Tb2–O3  | 2.287(5)  | Tb2–O18 | 2.316(8)  | Tb2–O20 | 2.324(7)  |
| Tb2–O9  | 2.368(18) | Tb2–O6  | 2.402(5)  | Tb2–O10 | 2.44(2)   |
| Tb2–O5  | 2.471(4)  |         |           |         |           |
| 5       |           |         |           |         |           |
| Dy1–O11 | 2.294(6)  | Dy1–O8  | 2.324(5)  | Dy1–O7  | 2.353(6)  |
| Dy1–O12 | 2.370(5)  | Dy1–O2  | 2.389(6)  | Dy1–O16 | 2.395(8)  |
| Dy1–O13 | 2.395(9)  | Dy1–O1  | 2.458(6)  | Dy2–O4  | 2.274(5)  |
| Dy2–O3  | 2.284(7)  | Dy2–O14 | 2.285(11) | Dy2–O15 | 2.319(11) |
| Dy2–O9  | 2.365(7)  | Dy2–O6  | 2.396(6)  | Dy2–O10 | 2.447(7)  |
| Dy2–O5  | 2.454(5)  |         |           |         |           |
| 6       |           |         |           |         |           |
| Er1–O11 | 2.265(6)  | Er1–O8  | 2.276(5)  | Er1–O7  | 2.335(6)  |
| Er1–O12 | 2.345(6)  | Er1–O1  | 2.356(7)  | Er1–O13 | 2.374(9)  |
| Er1–O14 | 2.393(9)  | Er1–O2  | 2.427(6)  | Er2–O4  | 2.256(5)  |
| Er2–O3  | 2.287(7)  | Er2–O16 | 2.292(10) | Er2–O15 | 2.300(11) |
| Er2–O9  | 2.356(7)  | Er2–O6  | 2.380(6)  | Er2–O10 | 2.421(7)  |
| Er2–O5  | 2.435(5)  |         |           |         |           |

| 7       |          |         |           |         |           |
|---------|----------|---------|-----------|---------|-----------|
| Yb1–O11 | 2.248(6) | Yb1–O8  | 2.260(5)  | Yb1–O7  | 2.300(6)  |
| Yb1–O12 | 2.303(5) | Yb1–O2  | 2.319(6)  | Yb1–O13 | 2.321(9)  |
| Yb1–O1  | 2.397(6) | Yb1–O14 | 2.405(9)  | Yb2–O4  | 2.216(6)  |
| Yb2–O3  | 2.242(7) | Yb2–O15 | 2.265(10) | Yb2–O16 | 2.281(11) |
| Yb2–O10 | 2.324(7) | Yb2–O6  | 2.349(6)  | Yb2–O9  | 2.412(7)  |
| Yb2–O5  | 2.423(5) |         |           |         |           |

**Table S7** Selected bond angles (°) in **1–7**

| 1           |            |             |            |
|-------------|------------|-------------|------------|
| O11–Sm1–O13 | 142.5(2)   | O11–Sm1–O6  | 76.72(18)  |
| O13–Sm1–O6  | 75.61(19)  | O11–Sm1–O5  | 78.77(18)  |
| O13–Sm1–O5  | 138.61(19) | O6–Sm1–O5   | 126.89(16) |
| O11–Sm1–O12 | 123.37(18) | O13–Sm1–O12 | 75.4(2)    |
| O6–Sm1–O12  | 79.59(17)  | O5–Sm1–O12  | 75.93(18)  |
| O11–Sm1–O15 | 81.5(2)    | O13–Sm1–O15 | 66.6(2)    |
| O6–Sm1–O15  | 73.30(18)  | O5–Sm1–O15  | 146.50(19) |
| O12–Sm1–O15 | 137.5(2)   | O11–Sm1–O2  | 85.96(18)  |
| O13–Sm1–O2  | 103.2(2)   | O6–Sm1–O2   | 145.47(17) |
| O5–Sm1–O2   | 77.05(18)  | O12–Sm1–O2  | 134.24(18) |
| O15–Sm1–O2  | 74.8(2)    | O11–Sm1–O1  | 136.00(19) |
| O13–Sm1–O1  | 70.5(2)    | O6–Sm1–O1   | 145.56(18) |
| O5–Sm1–O1   | 78.55(18)  | O12–Sm1–O1  | 86.34(17)  |
| O15–Sm1–O1  | 97.87(19)  | O2–Sm1–O1   | 52.37(17)  |
| O16–Sm2–O3  | 85.5(2)    | O16–Sm2–O4  | 151.5(2)   |
| O3–Sm2–O4   | 90.16(18)  | O16–Sm2–O9  | 86.1(2)    |
| O3–Sm2–O9   | 150.58(19) | O4–Sm2–O9   | 110.0(2)   |
| O16–Sm2–O14 | 71.1(2)    | O3–Sm2–O14  | 81.7(2)    |
| O4–Sm2–O14  | 80.5(2)    | O9–Sm2–O14  | 121.7(2)   |
| O16–Sm2–O8  | 129.7(2)   | O3–Sm2–O8   | 84.77(19)  |
| O4–Sm2–O8   | 77.63(18)  | O9–Sm2–O8   | 79.16(19)  |
| O14–Sm2–O8  | 154.15(18) | O16–Sm2–O10 | 94.7(2)    |
| O3–Sm2–O10  | 158.06(19) | O4–Sm2–O10  | 79.24(18)  |
| O9–Sm2–O10  | 50.91(19)  | O14–Sm2–O10 | 77.6(2)    |
| O8–Sm2–O10  | 111.19(19) | O16–Sm2–O7  | 77.2(2)    |
| O3–Sm2–O7   | 77.21(17)  | O4–Sm2–O7   | 129.16(19) |
| O9–Sm2–O7   | 73.44(18)  | O14–Sm2–O7  | 142.97(19) |
| O8–Sm2–O7   | 52.55(16)  | O10–Sm2–O7  | 124.28(17) |
| 2           |            |             |            |
| O11–Eu1–O6  | 77.33(11)  | O11–Eu1–O5  | 78.00(12)  |
| O6–Eu1–O5   | 127.15(10) | O11–Eu1–O12 | 124.34(11) |
| O6–Eu1–O12  | 79.78(11)  | O5–Eu1–O12  | 76.94(12)  |



|             |            |             |            |
|-------------|------------|-------------|------------|
| O11–Eu1–O13 | 142.59(16) | O6–Eu1–O13  | 74.67(14)  |
| O5–Eu1–O13  | 139.23(15) | O12–Eu1–O13 | 74.11(16)  |
| O11–Eu1–O14 | 77.60(15)  | O6–Eu1–O14  | 75.49(15)  |
| O5–Eu1–O14  | 141.07(15) | O12–Eu1–O14 | 141.95(16) |
| O13–Eu1–O14 | 71.75(18)  | O11–Eu1–O2  | 85.63(10)  |
| O6–Eu1–O2   | 144.08(12) | O5–Eu1–O2   | 78.29(12)  |
| O12–Eu1–O2  | 135.01(11) | O13–Eu1–O2  | 103.09(15) |
| O14–Eu1–O2  | 70.03(15)  | O11–Eu1–O1  | 135.21(11) |
| O6–Eu1–O1   | 145.90(11) | O5–Eu1–O1   | 78.07(11)  |
| O12–Eu1–O1  | 85.65(10)  | O13–Eu1–O1  | 71.73(15)  |
| O14–Eu1–O1  | 99.02(14)  | O2–Eu1–O1   | 52.66(9)   |
| O4–Eu2–O3   | 87.43(12)  | O4–Eu2–O15  | 79.94(17)  |
| O3–Eu2–O15  | 78.19(19)  | O4–Eu2–O16  | 87.45(18)  |
| O3–Eu2–O16  | 150.0(2)   | O15–Eu2–O16 | 71.8(2)    |
| O4–Eu2–O10  | 153.10(13) | O3–Eu2–O10  | 111.97(15) |
| O15–Eu2–O10 | 121.05(18) | O16–Eu2–O10 | 84.2(2)    |
| O4–Eu2–O8   | 86.00(14)  | O3–Eu2–O8   | 80.11(12)  |
| O15–Eu2–O8  | 154.56(17) | O16–Eu2–O8  | 128.96(19) |
| O10–Eu2–O8  | 79.57(16)  | O4–Eu2–O9   | 154.89(12) |
| O3–Eu2–O9   | 78.61(12)  | O15–Eu2–O9  | 76.85(18)  |
| O16–Eu2–O9  | 94.24(18)  | O10–Eu2–O9  | 51.63(13)  |
| O8–Eu2–O9   | 111.60(15) | O4–Eu2–O7   | 79.33(11)  |
| O3–Eu2–O7   | 131.57(12) | O15–Eu2–O7  | 142.31(18) |
| O16–Eu2–O7  | 76.18(18)  | O10–Eu2–O7  | 73.85(12)  |
| O8–Eu2–O7   | 52.86(10)  | O9–Eu2–O7   | 125.42(11) |
| <b>3</b>    |            |             |            |
| O8–Gd1–O11  | 77.7(4)    | O8–Gd1–O15  | 77.1(4)    |
| O11–Gd1–O15 | 76.4(4)    | O8–Gd1–O7   | 126.3(3)   |
| O11–Gd1–O7  | 77.6(4)    | O15–Gd1–O7  | 139.4(4)   |
| O8–Gd1–O16  | 76.4(4)    | O11–Gd1–O16 | 144.0(5)   |
| O15–Gd1–O16 | 73.8(5)    | O7–Gd1–O16  | 138.4(4)   |
| O8–Gd1–O12  | 79.8(4)    | O11–Gd1–O12 | 124.2(3)   |
| O15–Gd1–O12 | 144.4(5)   | O7–Gd1–O12  | 76.2(4)    |
| O16–Gd1–O12 | 74.8(4)    | O8–Gd1–O2   | 145.1(4)   |
| O11–Gd1–O2  | 85.2(3)    | O15–Gd1–O2  | 69.4(5)    |
| O7–Gd1–O2   | 77.8(4)    | O16–Gd1–O2  | 102.4(4)   |
| O12–Gd1–O2  | 134.3(4)   | O8–Gd1–O1   | 145.8(4)   |
| O11–Gd1–O1  | 135.0(4)   | O15–Gd1–O1  | 98.8(4)    |
| O7–Gd1–O1   | 78.7(4)    | O16–Gd1–O1  | 70.0(4)    |
| O12–Gd1–O1  | 85.6(3)    | O2–Gd1–O1   | 52.6(3)    |
| O13–Gd2–O3  | 146.8(5)   | O13–Gd2–O4  | 92.0(5)    |
| O3–Gd2–O4   | 88.3(4)    | O13–Gd2–O14 | 70.2(5)    |
| O3–Gd2–O14  | 77.2(5)    | O4–Gd2–O14  | 80.6(4)    |
| O13–Gd2–O6  | 131.4(4)   | O3–Gd2–O6   | 81.7(4)    |

|              |            |              |            |
|--------------|------------|--------------|------------|
| O4-Gd2-O6    | 86.0(4)    | O14-Gd2-O6   | 155.2(4)   |
| O13-Gd2-O9   | 79.0(5)    | O3-Gd2-O9    | 113.5(4)   |
| O4-Gd2-O9    | 152.3(3)   | O14-Gd2-O9   | 119.5(4)   |
| O6-Gd2-O9    | 80.8(4)    | O13-Gd2-O10  | 87.9(5)    |
| O3-Gd2-O10   | 78.6(4)    | O4-Gd2-O10   | 155.2(4)   |
| O14-Gd2-O10  | 76.1(4)    | O6-Gd2-O10   | 112.4(4)   |
| O9-Gd2-O10   | 51.5(3)    | O13-Gd2-O5   | 79.0(5)    |
| O3-Gd2-O5    | 133.3(4)   | O4-Gd2-O5    | 79.5(3)    |
| O14-Gd2-O5   | 142.4(4)   | O6-Gd2-O5    | 52.8(3)    |
| O9-Gd2-O5    | 73.1(3)    | O10-Gd2-O5   | 124.6(3)   |
| 4            |            |              |            |
| O11-Tb1-O8   | 77.48(16)  | O11-Tb1-O7   | 78.20(17)  |
| O8-Tb1-O7    | 126.98(16) | O11-Tb1-O12  | 124.21(17) |
| O8-Tb1-O12   | 79.42(17)  | O7-Tb1-O12   | 76.69(17)  |
| O11-Tb1-O17  | 142.5(2)   | O8-Tb1-O17   | 75.19(19)  |
| O7-Tb1-O17   | 139.2(2)   | O12-Tb1-O17  | 74.9(2)    |
| O11-Tb1-O19A | 83.2(6)    | O8-Tb1-O19A  | 74.5(7)    |
| O7-Tb1-O19A  | 146.4(6)   | O12-Tb1-O19A | 136.5(6)   |
| O17-Tb1-O19A | 65.2(6)    | O11-Tb1-O19  | 74.5(5)    |
| O8-Tb1-O19   | 76.6(5)    | O7-Tb1-O19   | 138.3(5)   |
| O12-Tb1-O19  | 145.0(5)   | O17-Tb-O19   | 74.6(5)    |
| O9-Tb2-O10A  | 48.6(7)    | O11-Tb1-O1   | 84.85(16)  |
| O8-Tb1-O1    | 144.11(18) | O7-Tb1-O1    | 78.12(19)  |
| O12-Tb1-O1   | 135.56(17) | O17-Tb1-O1   | 103.0(2)   |
| O19A -Tb1-O1 | 72.5(6)    | O19-Tb1-O1   | 68.6(5)    |
| O11-Tb1-O2   | 135.15(16) | O8-Tb1-O2    | 145.72(15) |
| O7-Tb1-O2    | 78.35(16)  | O12-Tb1-O2   | 86.13(15)  |
| O17-Tb1-O2   | 71.1(2)    | O19A-Tb1-O2  | 96.2(6)    |
| O19-Tb1-O2   | 99.7(5)    | O1-Tb1-O2    | 53.12(14)  |
| O4-Tb2-O3    | 87.84(19)  | O4-Tb2-O18A  | 78.6(5)    |
| O3-Tb2-O18A  | 146.6(5)   | O4-Tb2-O18   | 93.0(4)    |
| O3-Tb2-O18   | 151.1(4)   | O6-Tb2-O10A  | 104.4(12)  |
| O4-Tb2-O20   | 80.4(2)    | O3-Tb2-O20   | 77.8(3)    |
| O18A-Tb2-O20 | 70.0(6)    | O18-Tb2-O20  | 73.9(5)    |
| O4-Tb2-O9    | 154.1(4)   | O3-Tb2-O9    | 105.9(8)   |
| O18A-Tb2-O9  | 99.1(9)    | O18-Tb2-O9   | 85.3(9)    |
| O20-Tb2-O9   | 123.5(4)   | O4-Tb2-O6    | 86.0(2)    |
| O3-Tb2-O6    | 79.96(18)  | O18A-Tb2-O6  | 128.5(6)   |
| O18-Tb2-O6   | 128.9(4)   | O20-Tb2-O6   | 154.3(3)   |
| O9-Tb2-O6    | 75.2(5)    | O4-Tb2-O10   | 153.3(3)   |
| O3-Tb2-O10   | 81.7(6)    | O18A-Tb2-O10 | 96.9(9)    |
| O18-Tb2-O10  | 84.8(8)    | O20-Tb2-O10  | 73.5(5)    |
| O9-Tb2-O10   | 52.4(3)    | O6-Tb2-O10   | 115.8(6)   |
| O4-Tb2-O9A   | 149.5(5)   | O3-Tb2-O9A   | 120.6(10)  |

|              |            |               |            |
|--------------|------------|---------------|------------|
| O18A–Tb2–O9A | 81.6(14)   | O18–Tb2–O9A   | 67.6(15)   |
| O20–Tb2–O9A  | 114.0(12)  | O5–Tb2–O10A   | 123.5(7)   |
| O6–Tb2–O9A   | 88.5(14)   | O10–Tb2–O9A   | 52.1(5)    |
| O4–Tb2–O5    | 79.55(16)  | O3–Tb2–O5     | 131.95(17) |
| O18A–Tb2–O5  | 75.6(6)    | O18–Tb2–O5    | 76.3(4)    |
| O20–Tb2–O5   | 142.9(3)   | O9–Tb2–O5     | 74.9(5)    |
| O6–Tb2–O5    | 53.24(15)  | O10–Tb2–O5    | 125.2(3)   |
| O9A–Tb2–O5   | 73.2(5)    | O4–Tb2–O10A   | 156.6(6)   |
| O3–Tb2–O10A  | 73.8(6)    | O18A–Tb2–O10A | 108.9(11)  |
| O18–Tb2–O10A | 96.2(10)   | O20–Tb2–O10A  | 81.6(11)   |
| <b>5</b>     |            |               |            |
| O11–Dy1–O8   | 77.2(2)    | O11–Dy1–O7    | 78.6(2)    |
| O8–Dy1–O7    | 126.72(18) | O11–Dy1–O12   | 125.1(2)   |
| O8–Dy1–O12   | 79.6(2)    | O7–Dy1–O12    | 76.8(2)    |
| O11–Dy1–O2   | 84.4(2)    | O8–Dy1–O2     | 143.5(2)   |
| O7–Dy1–O2    | 78.8(2)    | O12–Dy1–O2    | 135.9(2)   |
| O11–Dy1–O16  | 78.2(3)    | O8–Dy1–O16    | 74.4(2)    |
| O7–Dy1–O16   | 143.4(2)   | O12–Dy1–O16   | 139.8(3)   |
| O2–Dy1–O16   | 71.1(3)    | O11–Dy1–O13   | 142.4(3)   |
| O8–Dy1–O13   | 75.0(2)    | O7–Dy1–O13    | 138.8(3)   |
| O12–Dy1–O13  | 73.7(3)    | O2–Dy1–O13    | 103.6(2)   |
| O16–Dy1–O13  | 70.3(3)    | O11–Dy1–O1    | 134.9(2)   |
| O8–Dy1–O1    | 146.0(2)   | O7–Dy1–O1     | 78.7(2)    |
| O12–Dy1–O1   | 86.3(2)    | O2–Dy1–O1     | 53.1(2)    |
| O16–Dy1–O1   | 98.5(2)    | O13–Dy1–O1    | 71.3(3)    |
| O4–Dy2–O3    | 88.2(2)    | O4–Dy2–O14    | 78.6(3)    |
| O3–Dy2–O14   | 77.7(3)    | O4–Dy2–O15    | 88.4(3)    |
| O3–Dy2–O15   | 149.5(3)   | O14–Dy2–O15   | 71.9(4)    |
| O4–Dy2–O9    | 152.6(2)   | O3–Dy2–O9     | 111.3(3)   |
| O14–Dy2–O9   | 123.2(3)   | O15–Dy2–O9    | 83.9(3)    |
| O4–Dy2–O6    | 85.4(2)    | O3–Dy2–O6     | 80.1(2)    |
| O14–Dy2–O6   | 152.9(3)   | O15–Dy2–O6    | 129.8(3)   |
| O9–Dy2–O6    | 79.6(3)    | O4–Dy2–O10    | 154.6(2)   |
| O3–Dy2–O10   | 78.1(2)    | O14–Dy2–O10   | 77.7(3)    |
| O15–Dy2–O10  | 92.7(3)    | O9–Dy2–O10    | 52.4(2)    |
| O6–Dy2–O10   | 112.6(2)   | O4–Dy2–O5     | 79.8(2)    |
| O3–Dy2–O5    | 132.5(2)   | O14–Dy2–O5    | 141.8(3)   |
| O15–Dy2–O5   | 76.4(3)    | O9–Dy2–O5     | 72.9(2)    |
| O6–Dy2–O5    | 53.43(18)  | O10–Dy2–O5    | 125.1(2)   |
| <b>6</b>     |            |               |            |
| O11–Er1–O8   | 77.3(2)    | O11–Er1–O7    | 78.4(2)    |
| O8–Er1–O7    | 127.21(19) | O11–Er1–O12   | 125.4(2)   |
| O8–Er1–O12   | 80.2(2)    | O7–Er1–O12    | 77.1(2)    |
| O11–Er1–O1   | 84.4(2)    | O8–Er1–O1     | 141.4(2)   |

|             |            |             |           |
|-------------|------------|-------------|-----------|
| O7–Er1–O1   | 80.5(2)    | O12–Er1–O1  | 136.9(2)  |
| O11–Er1–O13 | 141.5(3)   | O8–Er1–O13  | 74.7(2)   |
| O7–Er1–O13  | 140.0(3)   | O12–Er1–O13 | 74.8(3)   |
| O1–Er1–O13  | 101.6(3)   | O11–Er1–O14 | 78.6(3)   |
| O8–Er1–O14  | 72.1(3)    | O7–Er1–O14  | 144.9(2)  |
| O12–Er1–O14 | 138.1(3)   | O1–Er1–O14  | 71.2(3)   |
| O13–Er1–O14 | 68.0(3)    | O11–Er1–O2  | 134.5(2)  |
| O8–Er1–O2   | 146.1(2)   | O7–Er1–O2   | 78.6(2)   |
| O12–Er1–O2  | 86.2(2)    | O1–Er1–O2   | 53.3(2)   |
| O13–Er1–O2  | 71.8(3)    | O14–Er1–O2  | 99.6(3)   |
| O4–Er2–O3   | 88.9(2)    | O4–Er2–O16  | 79.2(3)   |
| O3–Er2–O16  | 77.0(3)    | O4–Er2–O15  | 90.1(3)   |
| O3–Er2–O15  | 149.9(3)   | O16–Er2–O15 | 73.3(3)   |
| O4–Er2–O9   | 152.2(2)   | O3–Er2–O9   | 110.6(3)  |
| O16–Er2–O9  | 123.4(3)   | O15–Er2–O9  | 82.6(3)   |
| O4–Er2–O6   | 85.2(2)    | O3–Er2–O6   | 79.0(2)   |
| O16–Er2–O6  | 151.5(3)   | O15–Er2–O6  | 130.9(3)  |
| O9–Er2–O6   | 79.7(3)    | O4–Er2–O10  | 154.4(2)  |
| O3–Er2–O10  | 78.7(2)    | O16–Er2–O10 | 76.3(3)   |
| O15–Er2–O10 | 89.7(3)    | O9–Er2–O10  | 52.8(2)   |
| O6–Er2–O10  | 113.7(2)   | O4–Er2–O5   | 79.62(19) |
| O3–Er2–O5   | 132.2(2)   | O16–Er2–O5  | 143.2(3)  |
| O15–Er2–O5  | 77.0(3)    | O9–Er2–O5   | 72.6(2)   |
| O6–Er2–O5   | 54.02(19)  | O10–Er2–O5  | 125.1(2)  |
| 7           |            |             |           |
| O11–Yb1–O8  | 77.1(2)    | O11–Yb1–O7  | 78.9(2)   |
| O8–Yb1–O7   | 128.07(19) | O11–Yb1–O12 | 125.5(2)  |
| O8–Yb1–O12  | 79.4(2)    | O7–Yb1–O12  | 78.4(2)   |
| O11–Yb1–O2  | 83.9(2)    | O8–Yb1–O2   | 139.2(2)  |
| O7–Yb1–O2   | 81.7(2)    | O12–Yb1–O2  | 139.5(2)  |
| O11–Yb1–O13 | 138.8(3)   | O8–Yb1–O13  | 74.8(2)   |
| O7–Yb1–O13  | 142.2(3)   | O12–Yb1–O13 | 77.6(3)   |
| O2–Yb1–O13  | 98.4(3)    | O11–Yb1–O1  | 134.9(2)  |
| O8–Yb1–O1   | 145.7(2)   | O7–Yb1–O1   | 78.2(2)   |
| O12–Yb–O1   | 86.6(2)    | O2–Yb1–O1   | 54.8(2)   |
| O13–Yb1–O1  | 71.7(3)    | O11–Yb1–O14 | 77.5(3)   |
| O8–Yb1–O14  | 73.3(3)    | O7–Yb1–O14  | 142.7(3)  |
| O12–Yb1–O14 | 138.8(3)   | O2–Yb1–O14  | 67.5(3)   |
| O13–Yb1–O14 | 66.0(3)    | O1–Yb1–O14  | 99.0(2)   |
| O4–Yb2–O3   | 88.8(2)    | O4–Yb2–O15  | 79.4(3)   |
| O3–Yb2–O15  | 77.4(3)    | O4–Yb2–O16  | 88.8(3)   |
| O3–Yb2–O16  | 149.4(3)   | O15–Yb2–O16 | 72.1(4)   |
| O4–Yb2–O10  | 152.6(2)   | O3–Yb2–O10  | 109.3(3)  |
| O15–Yb2–O10 | 123.7(3)   | O16–Yb2–O10 | 85.5(3)   |

|             |           |             |          |
|-------------|-----------|-------------|----------|
| O4–Yb2– O6  | 85.3(2)   | O3–Yb2–O6   | 79.0(2)  |
| O15–Yb2– O6 | 152.0(3)  | O16–Yb2–O6  | 131.2(3) |
| O10–Yb2–O6  | 78.5(3)   | O4– Yb2– O9 | 154.4(2) |
| O3–Yb2–O9   | 78.1(2)   | O15–Yb2–O9  | 76.3(3)  |
| O16–Yb2–O9  | 91.5(3)   | O10–Yb2–O9  | 52.8(2)  |
| O6–Yb2–O9   | 113.1(2)  | O4–Yb2–O5   | 79.6(2)  |
| O3–Yb2–O5   | 132.2(2)  | O15–Yb2–O5  | 142.9(3) |
| O16–Yb2–O5  | 77.2(3)   | O10–Yb2–O5  | 73.0(2)  |
| O6–Yb2–O5   | 54.09(19) | O9–Yb2–O5   | 125.4(2) |

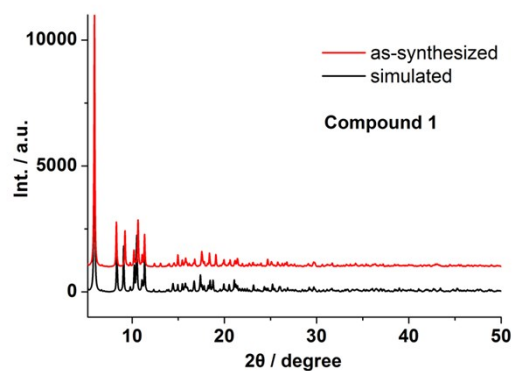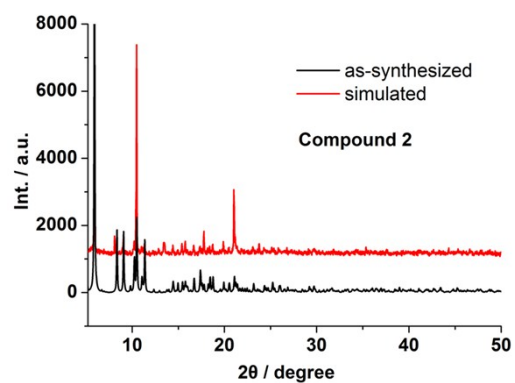

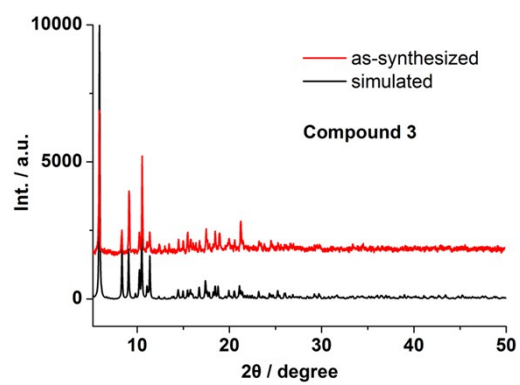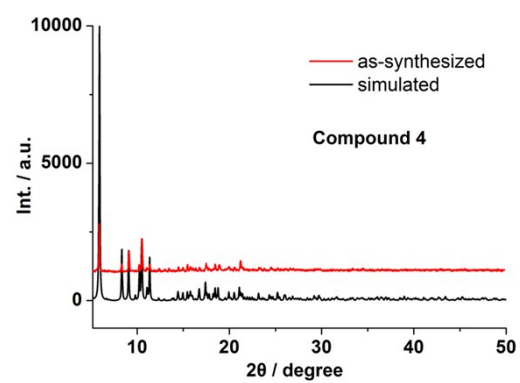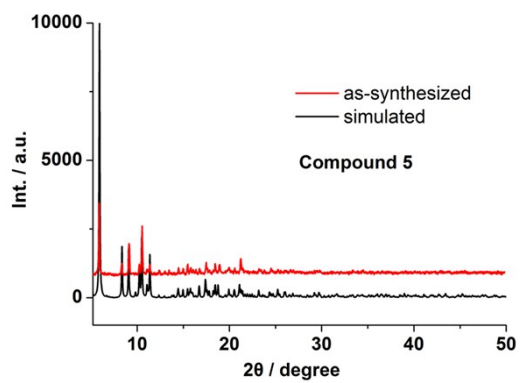

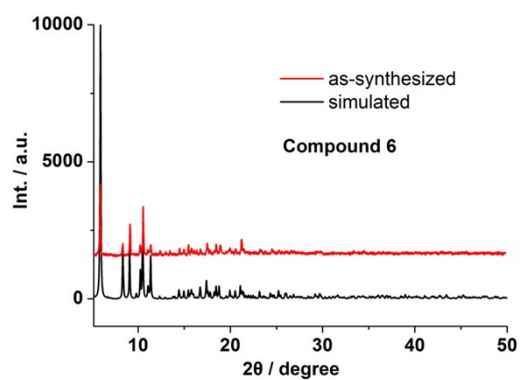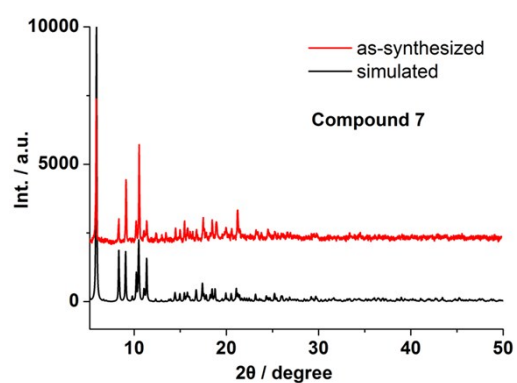

**Fig. S4** PXRD patterns of simulated from the X-ray single-crystal structures and as-synthesized samples of **1–7**.

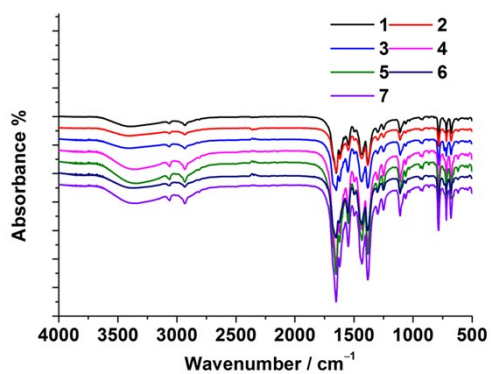

**Fig. S5** The IR spectra of **1–7** recorded from a KBr pellet.

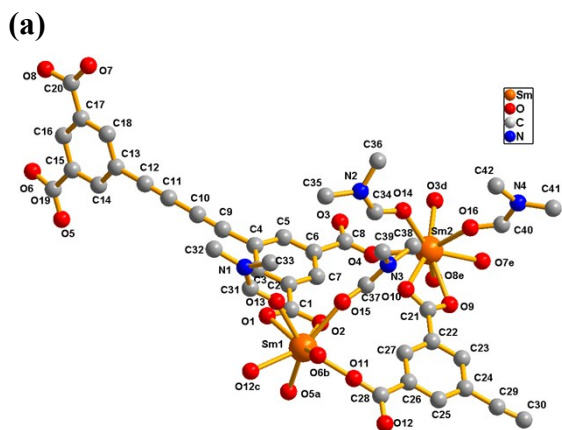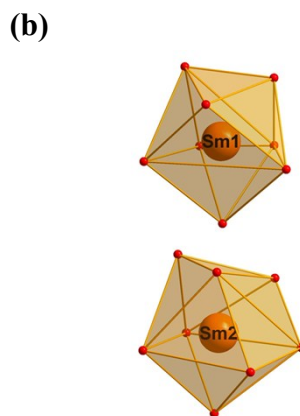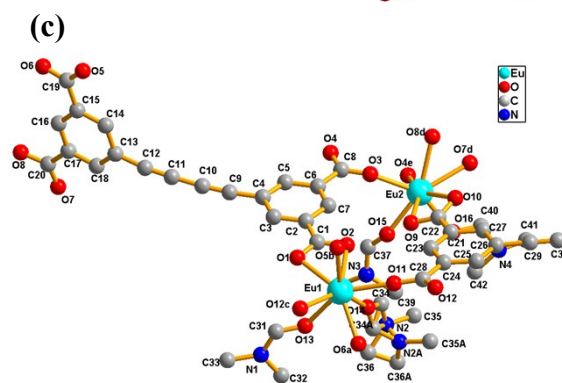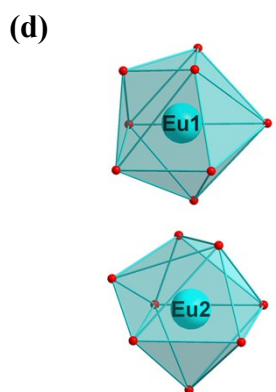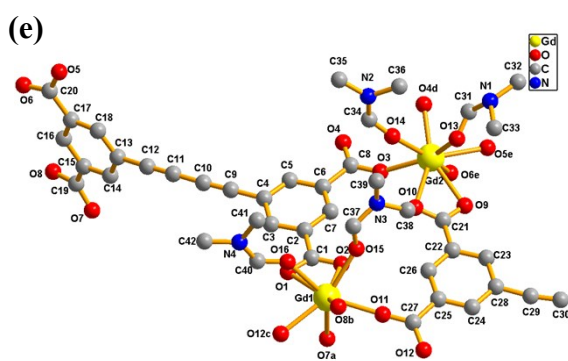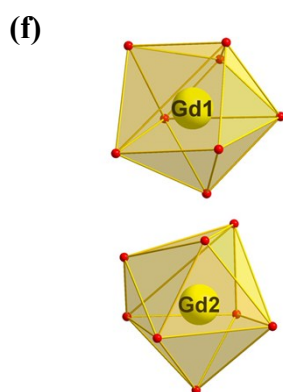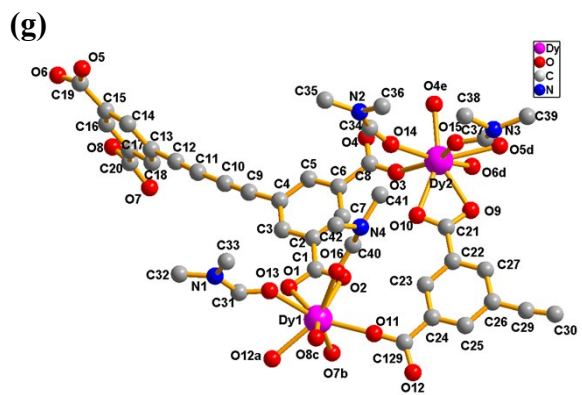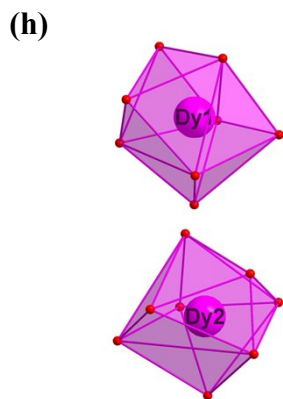



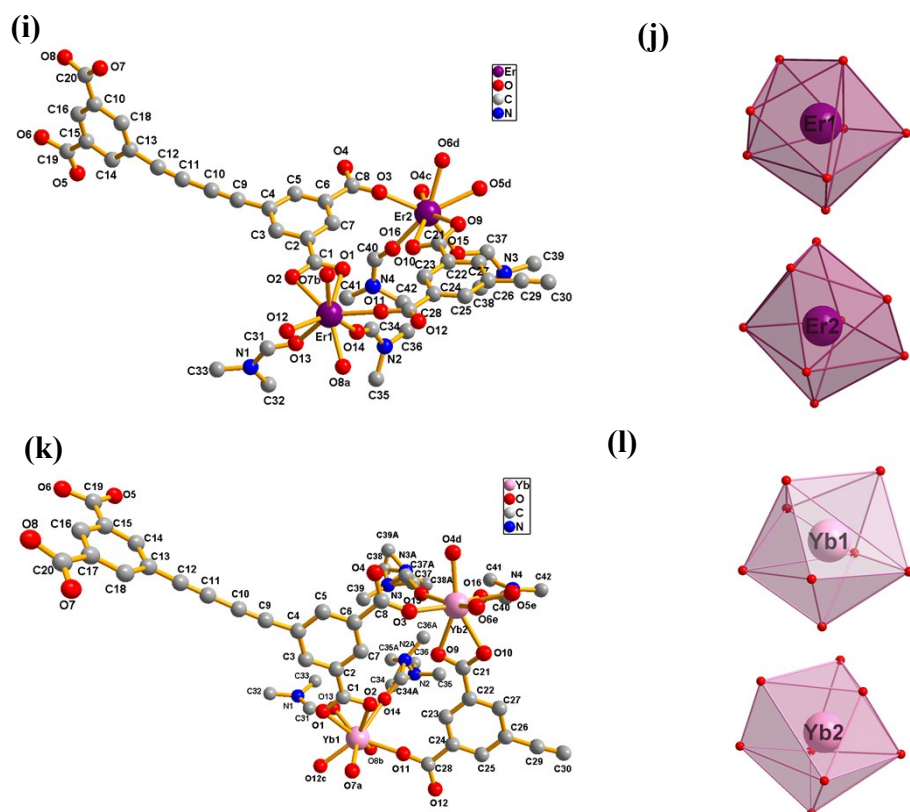

**Fig. S6** (a) Coordination environments of  $\text{Sm}^{3+}$  ions with the H atoms omitted for clarity; symmetry codes:  $a = 0.5-x, 1.5+y, 0.5-z$ ;  $b = 1+x, 2-y, 0.5+z$ ;  $c = 1-x, 2+y, 0.5-z$ ;  $d = 1-x, 1+y, 0.5-z$ ;  $e = 1+x, 1+y, 1+z$ ; (b) Coordination polyhedron of  $\text{Sm}^{3+}$  ions; (c) Coordination environments of  $\text{Eu}^{3+}$  ions with the H atoms omitted for clarity; symmetry codes:  $a = 1-x, -1+y, 1.5-z$ ;  $b = 0.5-x, -0.5+y, 1.5-z$ ;  $c = x, -y, 0.5+z$ ;  $d = 1-x, 1-y, 2-z$ ;  $e = x, 1-y, 0.5+z$ ; (d) Coordination polyhedron of  $\text{Eu}^{3+}$  ions; (e) Coordination environments of  $\text{Gd}^{3+}$  ions with the H atoms omitted for clarity; symmetry codes:  $a = 0.5-x, 0.5+y, 2.5-z$ ;  $b = 1+x, 2-y, 0.5+z$ ;  $c = 1-x, 1+y, 2.5-z$ ;  $d = 1-x, y, 2.5-z$ ;  $e = 1+x, y, 1+z$ ; (f) Coordination polyhedron of  $\text{Gd}^{3+}$  ions; (g) Coordination environments of  $\text{Dy}^{3+}$  ions with the H atoms omitted for clarity; symmetry codes:  $a = 0.5-x, 0.5-y, -z$ ;  $b = 1-x, -y, -z$ ;  $c = -0.5+x, 0.5+y, z$ ;  $d = -0.5+x, -0.5-y, -0.5+z$ ;  $e = 0.5-x, -0.5-y, -z$ ; (h) Coordination polyhedron of  $\text{Dy}^{3+}$  ions; (i) Coordination environments of  $\text{Er}^{3+}$  ions with the H atoms omitted for clarity; symmetry codes:  $a = 1-x, -y, 2-z$ ;  $b = -0.5+x, 0.5+y, z$ ;  $c = x, 1+y, z$ ;  $d = 1-x, 1+y, 2.5-z$ ; (j) Coordination polyhedron of  $\text{Er}^{3+}$  ions; (k) Coordination environments of  $\text{Yb}^{3+}$  ions with the H atoms omitted for clarity; symmetry codes:  $a = x, y, 1+z$ ;  $b =$

$1.5-x, -0.5-y, 3-z$ ;  $c = 0.5+x, -0.5+y, 1+z$ ;  $d = 0.5+x, 0.5+y, 1+z$ ;  $e = 1.5-x, 0.5+y, 3.5-z$ ; (l) Coordination polyhedron of  $\text{Yb}^{3+}$  ions.

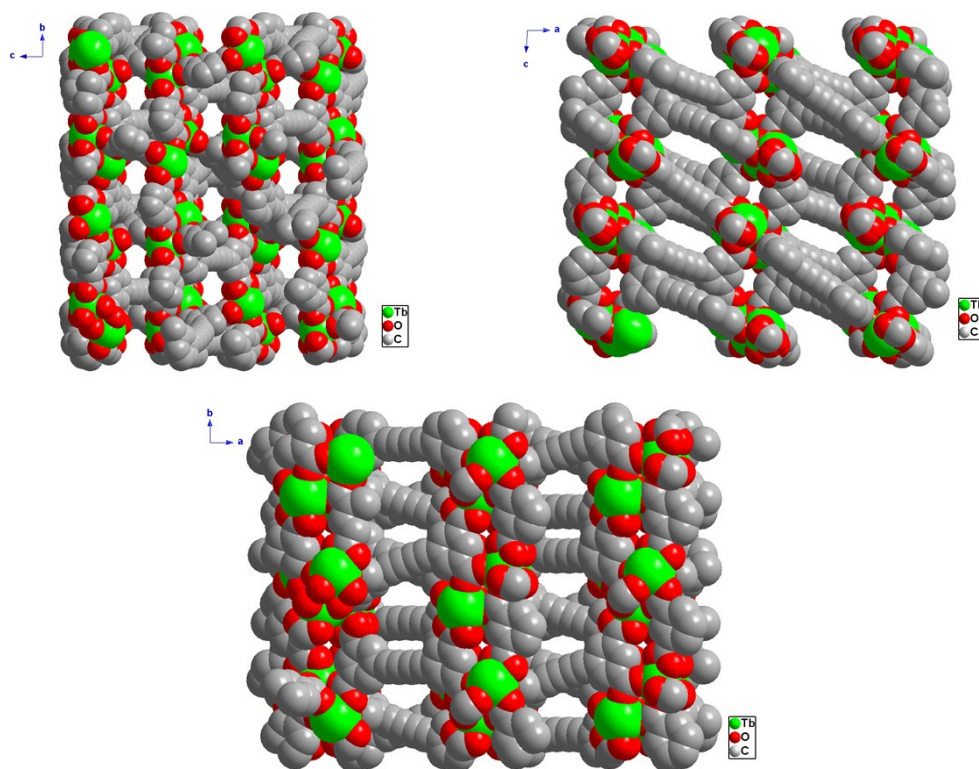

**Fig. S7** Space filled representation of the 3-D framework in **4** seen from a, b, and c directions; Hydrogens, coordinated DMF molecules are omitted for clarity.

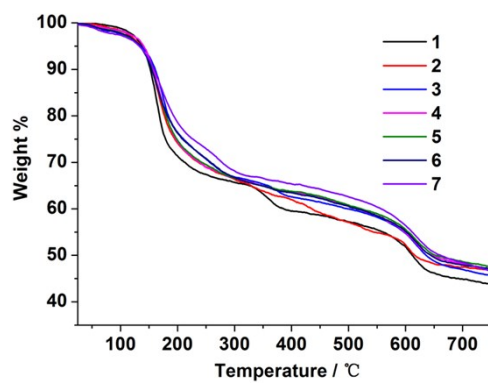

**Fig. S8** The TG curves of 1-7.

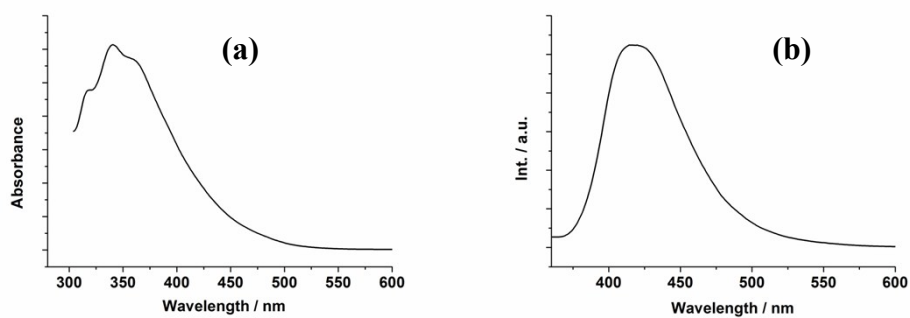

**Fig. S9** (a) UV-vis absorption and (b) emission spectra of H<sub>4</sub>BBTC in solid state at room temperature.

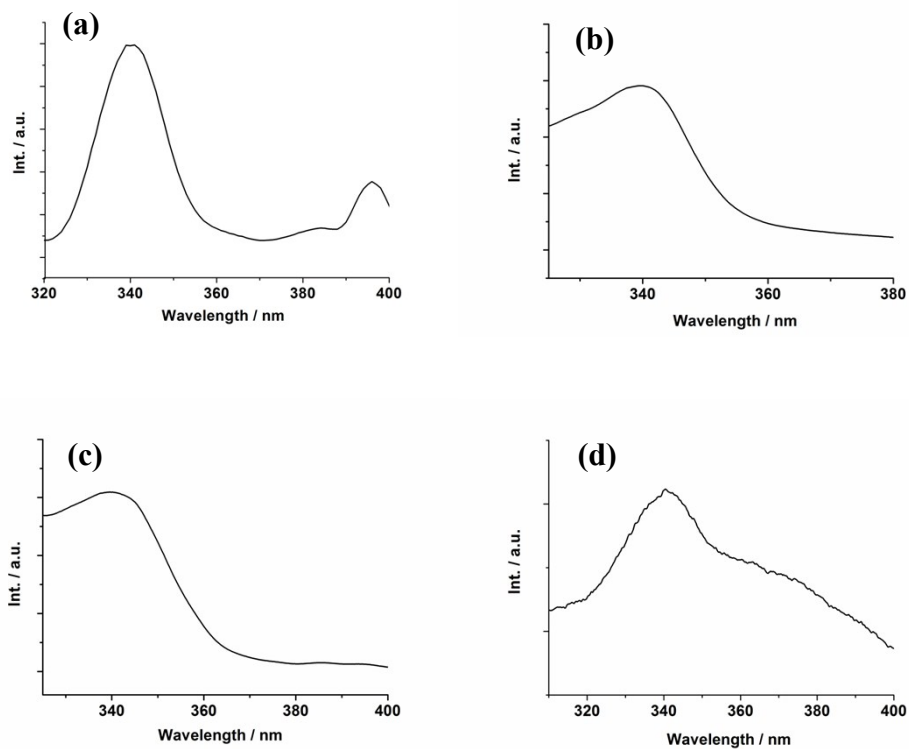

**Fig. S10** The excitation spectra of **2** (a), **3** (b), **4** (c), and **5** (d) in solid state at room temperature, monitored at 615, 467, 542 and 576 nm, respectively.

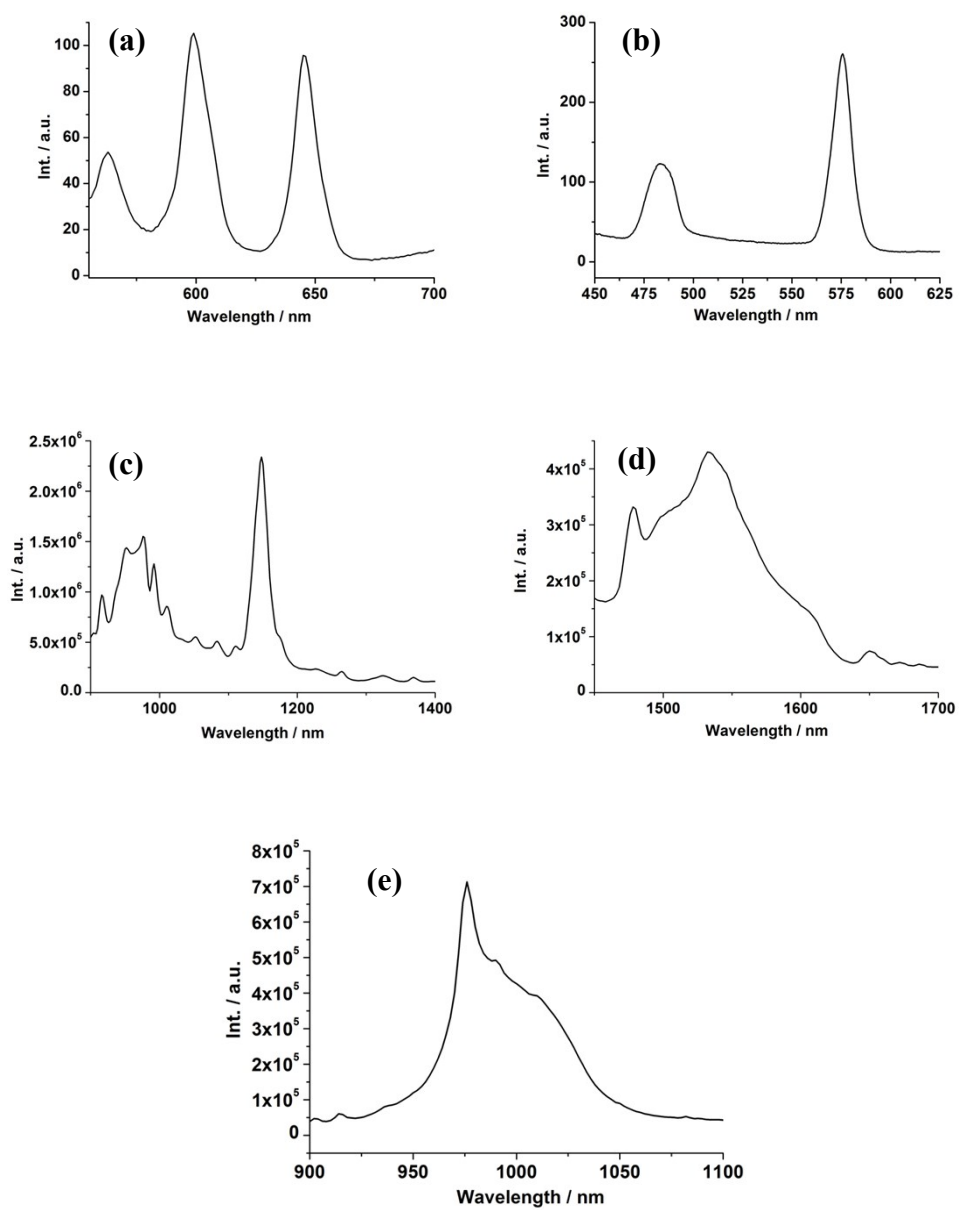

**Fig. S11** Emission spectra of **1** (a) and **5** (b), and NIR emission spectra of **5** (c), **6** (d) and **7** (e).

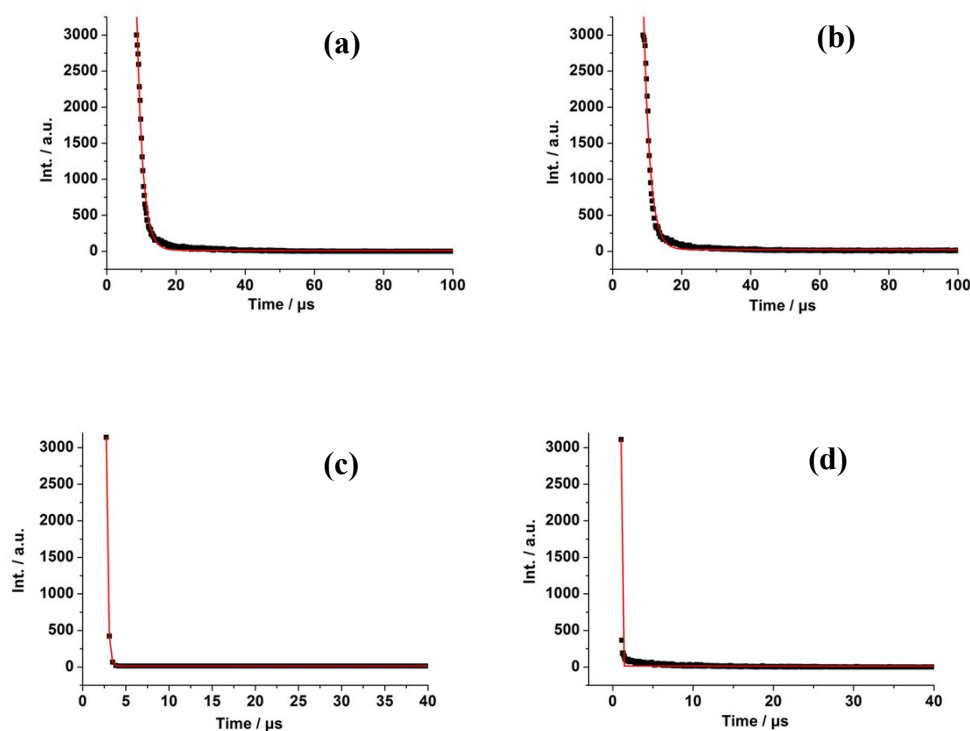

**Fig. S12** Luminescence decay profiles for **1** (a), **5** (b), **6** (c) and **7** (d).

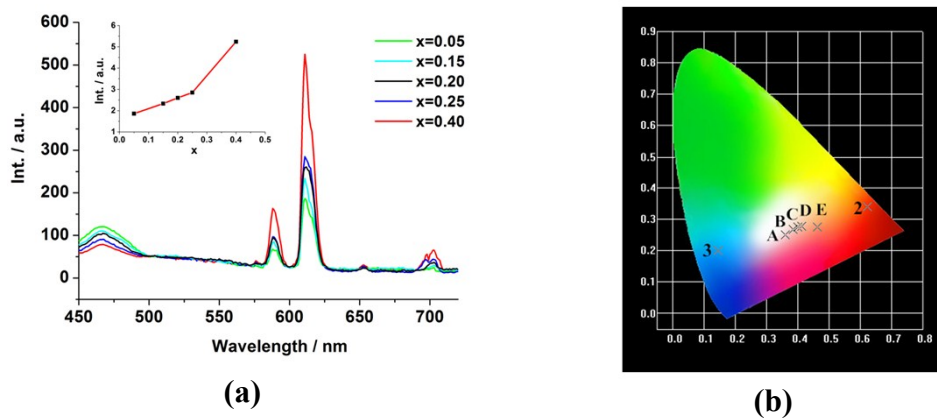

**Fig. S13** (a) Emission spectra of  $\text{Eu}_x\text{Gd}_{1-x}\text{-BBTC}$  with wide ranges of  $x = 0.05\text{--}0.4$  ( $\lambda_{\text{ex}} = 340 \text{ nm}$ ) in the solid state at room temperature and plot of luminescence intensity of the band corresponding to the  ${}^5\text{D}_0 \rightarrow {}^7\text{F}_2$  transition of  $\text{Eu}^{3+}$  ions against  $\text{Eu}^{3+}$  ions concentration; (b) CIE chromaticity diagram for  $\text{Eu}_x\text{Gd}_{1-x}\text{-BBTC}$  excited at 340 nm.  $\text{Eu}_x\text{Gd}_{1-x}\text{-BBTC}$  (Eu, Gd%): **3** (0, 100), **A** (5, 95), **B** (15, 85), **C** (20, 80), **D** (25, 75), **E** (40, 60) and **2** (100, 0).

**Table S8** The corresponding CIE coordinates of the  $\text{Eu}_x\text{Gd}_{1-x}\text{-BBTC}$  excited at 340nm

| CIE chromaticity coordinates                   |                |
|------------------------------------------------|----------------|
| $\text{Gd-BBTC}$                               | (0.144, 0.199) |
| $\text{Eu}_{0.05}\text{Gd}_{0.95}\text{-BBTC}$ | (0.360, 0.251) |
| $\text{Eu}_{0.15}\text{Gd}_{0.85}\text{-BBTC}$ | (0.384, 0.267) |
| $\text{Eu}_{0.20}\text{Gd}_{0.80}\text{-BBTC}$ | (0.400, 0.274) |
| $\text{Eu}_{0.25}\text{Gd}_{0.75}\text{-BBTC}$ | (0.412, 0.277) |
| $\text{Eu}_{0.4}\text{Gd}_{0.6}\text{-BBTC}$   | (0.463, 0.276) |
| $\text{Eu-BBTC}$                               | (0.622, 0.340) |

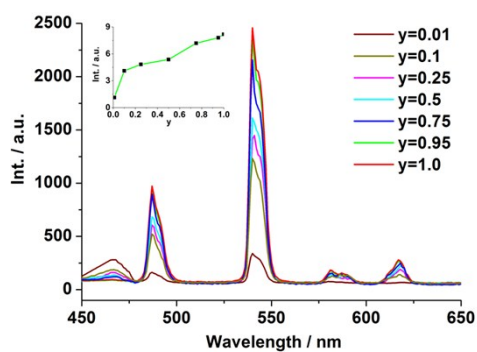

(a)

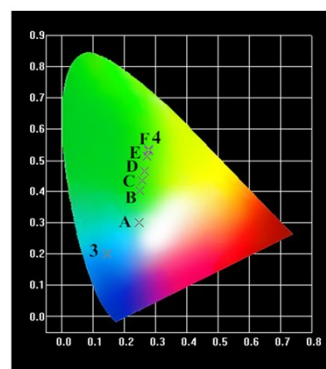

(b)

**Fig. S14** (a) Emission spectra of  $\text{Tb}_y\text{Gd}_{1-y}\text{-BBTC}$  with the ranges of  $y = 0.01\text{--}1.0$  ( $\lambda_{\text{ex}} = 340 \text{ nm}$ ) in the solid state at room temperature and Plot of luminescence intensity (the  $^5\text{D}_4 \rightarrow ^7\text{F}_5$  band) of  $\text{Tb}^{3+}$  ions against  $\text{Tb}^{3+}$  ion concentration; (b) CIE chromaticity diagram for  $\text{Tb}_y\text{Gd}_{1-y}\text{-BBTC}$  excited at 340 nm.  $\text{Tb}_y\text{Gd}_{1-y}\text{-BBTC}$  (Tb, Gd%): **3** (0, 100), **A** (1, 99), **B** (10, 90), **C** (25, 75), **D** (50, 50), **E** (75, 25), **F** (95, 5) and **4** (100, 0).

**Table S9** The corresponding CIE coordinates of the  $\text{Tb}_y\text{Gd}_{1-y}\text{-BBTC}$  excited at 340 nm

| CIE chromaticity coordinates                   |                |
|------------------------------------------------|----------------|
| $\text{Tb}_{0.01}\text{Gd}_{0.99}\text{-BBTC}$ | (0.247, 0.299) |
| $\text{Tb}_{0.1}\text{Gd}_{0.9}\text{-BBTC}$   | (0.251, 0.402) |
| $\text{Tb}_{0.25}\text{Gd}_{0.75}\text{-BBTC}$ | (0.258, 0.434) |
| $\text{Tb}_{0.5}\text{Gd}_{0.5}\text{-BBTC}$   | (0.265, 0.464) |
| $\text{Tb}_{0.75}\text{Gd}_{0.25}\text{-BBTC}$ | (0.273, 0.512) |
| $\text{Tb}_{0.95}\text{Gd}_{0.05}\text{-BBTC}$ | (0.277, 0.531) |
| $\text{Tb}\text{-BBTC}$                        | (0.278, 0.536) |

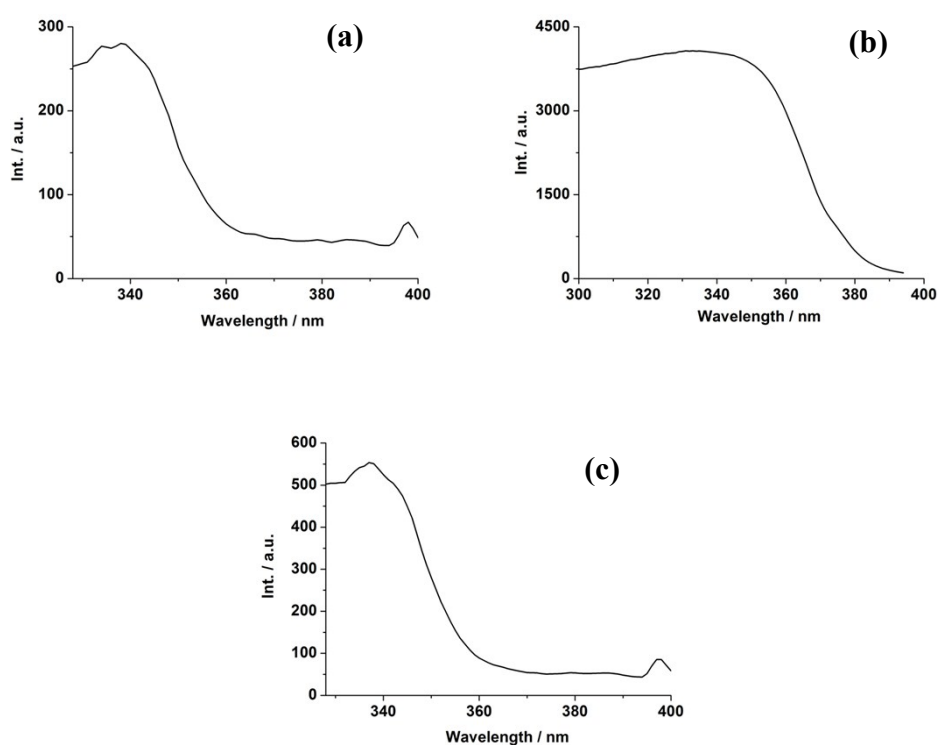

**Fig. S15** The excitation spectra of  $\text{Eu}_{0.25}\text{Gd}_{0.75}\text{-BBTC}$  (a),  $\text{Tb}_{0.5}\text{Gd}_{0.5}\text{-BBTC}$  (b), and  $\text{Eu}_{0.015}\text{Tb}_{0.035}\text{Gd}_{0.95}\text{-BBTC}$  (c) in solid state at room temperature, monitored at 615, 542 and 615 nm, respectively.

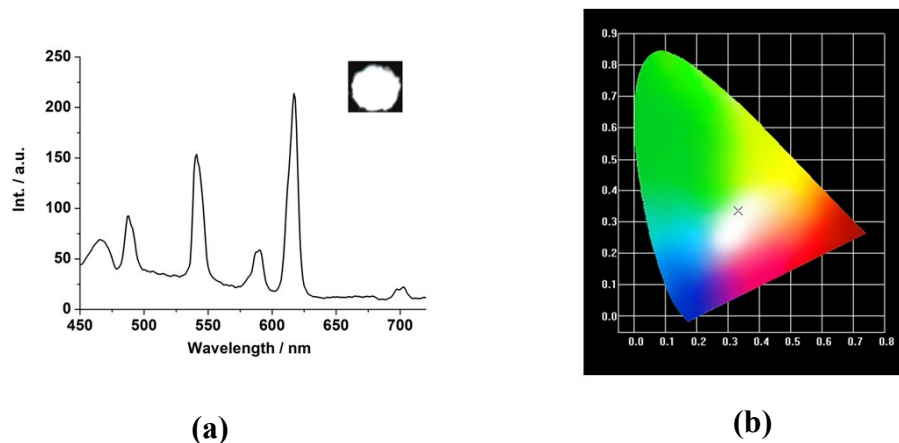

**Fig. S16** (a) Emission spectra and (b) CIE chromaticity diagram for  $\text{Eu}_{0.015}\text{Tb}_{0.035}\text{Gd}_{0.95}\text{-BBTC}$  excited at 340 nm.

**Table S10** The corresponding CIE coordinates of the  $\text{Eu}_x\text{Tb}_y\text{Gd}_{1-x-y}\text{-BBTC}$  excited at 340nm

| CIE chromaticity coordinates                                     |                       |
|------------------------------------------------------------------|-----------------------|
| $\text{Eu}_{0.045}\text{Tb}_{0.055}\text{Gd}_{0.9}\text{-BBTC}$  | (0.386, 0.409)        |
| $\text{Eu}_{0.04}\text{Tb}_{0.05}\text{Gd}_{0.91}\text{-BBTC}$   | (0.370, 0.403)        |
| $\text{Eu}_{0.03}\text{Tb}_{0.045}\text{Gd}_{0.925}\text{-BBTC}$ | (0.344, 0.391)        |
| $\text{Eu}_{0.025}\text{Tb}_{0.04}\text{Gd}_{0.935}\text{-BBTC}$ | (0.345, 0.364)        |
| $\text{Eu}_{0.015}\text{Tb}_{0.035}\text{Gd}_{0.95}\text{-BBTC}$ | <b>(0.334, 0.336)</b> |



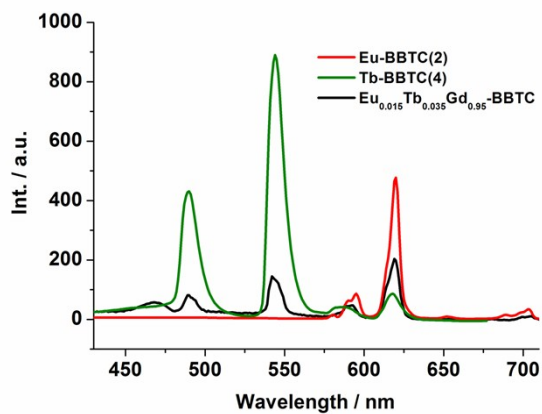

**Fig. S17** Emission spectra of complexes **2**, **4** and the doped  $\text{Eu}_{0.015}\text{Tb}_{0.035}\text{Gd}_{0.95}\text{-BBTC}$  complex excited at 340 nm.

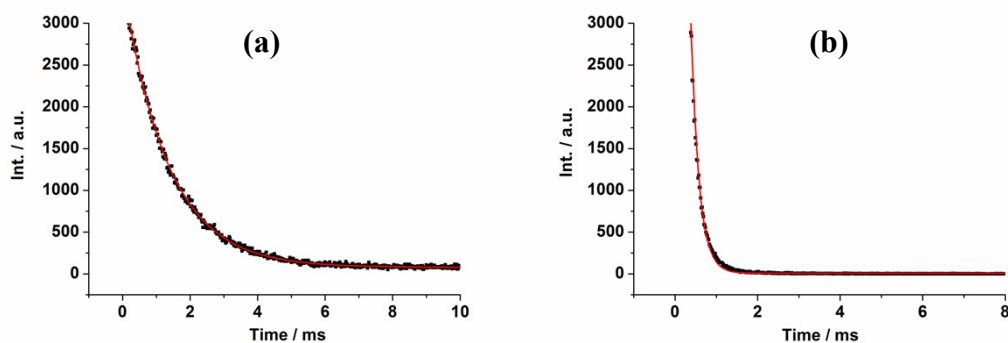

**Fig. S18** Luminescence decay profiles of  $\text{Eu}^{3+}$  (a) and  $\text{Tb}^{3+}$  (b) in the doped complex  $\text{Eu}_{0.015}\text{Tb}_{0.035}\text{Gd}_{0.95}\text{-BBTC}$  excited at 340 nm (monitored at 615 nm for  $\text{Eu}^{3+}$  (a), and 542 nm for  $\text{Tb}^{3+}$  (b), respectively).
